# Supplementary material for: Impacts of two-year multi-sectoral interventions on young adolescent girls’ education, health and economic outcomes: Adolescent Girls Initiative-Kenya randomized trial
Source: Research Square preprint supplement (doi:10.21203/rs.3.rs-110020/v1), 2020-12-09
Supplement: Supplementary file 1 [file 120e7d965b360d54885e6c99.docx]

Online Appendices for

**Impacts of two-year multi-sectoral interventions on young adolescent girls’ education, health and economic outcomes: Adolescent Girls Initiative-Kenya randomized trial**

Karen Austrian, Erica Soler-Hampejsek, Beth Kangwana, Yohannes Dibaba Wado, Benta Abuya and John A. Maluccio

November 2020

Appendix Table 1: Key Indicators for AGI-K Primary and Secondary Outcomes

Appendix Table 2: Kibera baseline means for key outcomes all observations, by study arm

Appendix Table 3: Wajir baseline means for key outcomes all observations, by study arm

Appendix Table 4: Correlates of two-year follow-up survey response

Appendix Table 5: Kibera estimated ITT effects, additional results for individual outcomes

Appendix Table 6: Kibera estimated ITT effects, additional results for summary outcomes

Appendix Table 7: Wajir estimated ITT effects, additional results for individual outcomes

Appendix Table 8: Wajir estimated ITT effects, additional results for summary outcomes

Appendix Table 9: Two-year follow-up outcomes variable definitions

**Appendix Table 1. Key Indicators for AGI-K Primary and Secondary Outcomes (reproduced from Austrian et al. [2016] Table 1)**

| OUTCOME DOMAIN | INDICATOR 1 | INDICATOR 2 | INDICATOR 3 |
| --- | --- | --- | --- |
| PRIMARY OUTCOMES | | | |
| WELL-BEING | Age at first birth (+) | Age at first sex (+) | Age at marriage (+) |
| SECONDARY OUTCOMES | | | |
| VIOLENCE | Experience of gender-based violence (-) | Positive gender norms related to violence (+) |  |
| EDUCATION | Mean grade of schooling (+) | Rate of primary school completion (+) |  |
| HEALTH | Knowledge on sexual and reproductive health (+) | Decision-making skills (+) | Contraceptive use (+) |
| WEALTH | Knowledge on financial education (+) | Saving (+) | Participation in income generating activities (+) |

Notes: Reproduced from Table 1, Austrian et al. (2016)

**Appendix** **Table 2. Kibera baseline means for key outcomes all observations, by study arm**

|  | (1) | (2) | (3) | (4) | (5) |
| --- | --- | --- | --- | --- | --- |
|  | V-Only | VE | VEH | VEHW | Overall |
| Background |  |  |  |  |  |
| Age, mean (sd) | 12.6 (1.2) | 12.5 (1.3) | 12.6 (1.2) | 12.5 (1.3) | 12.6 (1.3) |
| Cognitive score (0–16), mean (sd) [2,373] | 8.2 (3.0) | 8.4 (3.0) | 8.3 (3.1) | 8.3 (3.2) | 8.3 (3.1) |
| Lives with both parents, % [n=2,373] | 52.1 | 55.0 | 50.0 | 52.6 | 52.4 |
| Mother completed primary school, % [n=2,227] | 63.0 | 62.7 | 62.7 | 64.5 | 63.2 |
| Father completed primary school, % [n=1,962] | 76.3 | 79.3 | 75.3 | 79.5 | 77.6 |
| Violence Prevention |  |  |  |  |  |
| Experienced violence by a male in the past year, % | 29.3 | 29.9 | 31.4 | 33.1 | 30.9 |
| Positive gender schooling attitudes score (0-4), mean (sd) | 3.6 (0.7) | 3.6 (0.7) | 3.6 (0.7) | 3.6 (0.7) | 3.6 (0.7) |
| Education |  |  |  |  |  |
| Grade attainment, mean (sd) | 5.7 (1.4) | 5.7 (1.3) | 5.7 (1.4) | 5.7 (1.3) | 5.7 (1.4) |
| Primary school complete, % | 8.0 | 5.9 | 6.7 | 6.1 | 6.7 |
| Enrolled in current school year, % | 99.3 | 99.2 | 98.4 | 99.2 | 99.0 |
| Literate in Swahili and English, % [n=2,373] | 91.9 | 93.4 | 92.9 | 93.4 | 92.9 |
| Health |  |  |  |  |  |
| Knows most fertile period during menstrual cycle, % | 8.4 | 8.3 | 7.1 | 6.1 | 7.5 |
| General self-efficacy score (0-6), mean (sd) | 3.8 (1.7) | 4.0 (1.6) | 3.9 (1.6) | 4.0 (1.6) | 3.9 (1.6) |
| Wealth Creation |  |  |  |  |  |
| Financial literacy score (0-10), mean (sd) | 5.7 (1.9) | 5.6 (1.9) | 5.6 (1.9) | 5.8 (1.9) | 5.7 (1.9) |
| Saved money in the past six months, % | 27.1 | 25.2 | 26.4 | 28.4 | 26.8 |
| Worked for income in the last year, % | 10.9 | 12.0 | 11.7 | 10.0 | 11.1 |
| Household-level |  |  |  |  |  |
| Household expects girl to complete secondary, % [n=2,358] | 99.8 | 99.7 | 99.7 | 99.8 | 99.7 |
| Household expected girl to marry before age 22,1 % [n=1,874] | 2.6 | 4.1 | 3.4 | 4.7 | 3.7 |
| Household wealth quintile (1-5), mean (sd) [n=2,374] | 3.1 (1.4) | 3.0 (1.4) | 3.0 (1.4) | 3.0 (1.4) | 3.0 (1.4) |
| Sample by arm when n=2,390 | 597 | 592 | 609 | 592 | 2,390 |

Notes: N = 2,390 unless otherwise indicated. Final column is overall average. 1 Excluding don’t know responses.

**Appendix** **Table 3. Wajir baseline means for key outcomes all observations, by study arm**

|  | (1) | (2) | (3) | (4) | (5) |
| --- | --- | --- | --- | --- | --- |
|  | V-Only | VE | VEH | VEHW | Overall |
| Background |  |  |  |  |  |
| Age, mean (sd) | 11.9 (1.3) | 12.0 (1.3) | 11.8 (1.2) | 11.9 (1.3) | 11.9 (1.3) |
| Cognitive score (0–16), mean (sd) [2,109] | 5.2 (2.9) | 5.0 (3.0) | 4.9 (3.2) | 5.3 (3.1) | 5.1 (3.0) |
| Lives with both parents, % [n=2,124] | 73.5 | 73.0 | 76.9 | 73.8 | 74.3 |
| Mother ever attended school, % [n=2,123] | 1.2 | 1.3 | 0.6 | 0.4 | 0.8 |
| Father ever attended school, % [n=2,120] | 5.6 | 2.7 | 3.2 | 3.3 | 3.7 |
| Violence Prevention |  |  |  |  |  |
| Experienced violence by a male in the past year, % [n=2,121] | 4.0 | 4.1 | 3.0 | 2.2 | 3.3 |
| Positive gender schooling attitudes (0-4), mean (sd) [n=2,121] | 3.0 (1.0) | 2.8 (1.0) | 2.9 (1.1) | 2.9 (1.1) | 2.9 (1.1) |
| Education |  |  |  |  |  |
| Grade attainment, mean (sd) | 2.9 (2.2) | 2.7 (2.3) | 2.7 (2.2) | 2.5 (2.1) | 2.7 (2.2) |
| Primary school complete, % | 1.2 | 0.9 | 0.7 | 0.7 | 0.9 |
| Enrolled in current school year, % | 78.5 | 68.2 | 75.0 | 70.6 | 72.9 |
| Literate in Swahili and English, % [n=2,109] | 38.0 | 31.9 | 37.3 | 32.6 | 34.9 |
| Health |  |  |  |  |  |
| Knows most fertile period during menstrual cycle, % [2,121] | 1.4 | 0.6 | 0.8 | 0.7 | 0.8 |
| General self-efficacy score (0-6), mean (sd) [2,121] | 2.3 (2.0) | 2.3 (1.9) | 2.2 (1.9) | 1.7 (2.0) | 2.1 (2.0) |
| Wealth Creation |  |  |  |  |  |
| Financial literacy score (0-10), mean (sd) [2,121] | 4.4 (2.0) | 4.1 (2.1) | 4.0 (2.0) | 4.0 (2.0) | 4.1 (2.0) |
| Saved money in the past six months, % [2,121] | 0.6 | 0.4 | 0.4 | 0.7 | 0.5 |
| Worked for income in the last year, % [2,121] | 5.2 | 5.7 | 3.6 | 3.5 | 4.5 |
| Household-level |  |  |  |  |  |
| Household expects girl to complete secondary, % [n=2,119] | 85.8 | 80.0 | 80.9 | 81.7 | 82.0 |
| Household expected girl to marry before age 18,1 % [n=777] | 2.5 | 2.9 | 8.1 | 5.7 | 4.9 |
| Household wealth quintile (1-5), mean (sd) [n=2,123] | 3.0 (1.4) | 2.8 (1.5) | 3.0 (1.5) | 2.9 (1.4) | 2.9 (1.5) |
| Sample by arm when n=2,147 | 506 | 553 | 537 | 551 | 2,147 |

Notes: N = 2,147 unless otherwise indicated. Final column is overall average. 1 Excluding don’t know responses.

**Appendix Table 4a. Kibera correlates of two-year follow-up survey response**

|  |  | |  |  |  |  |
| --- | --- | --- | --- | --- | --- | --- |
| Dependent variable: Interviewed at two-year follow-up (=1) | | (1) | (2a) | (2b) | (2c) | (2d) |
|  |  | | X | T2*X | T3*X | T4*X |
| Study arms: V-only (ref) |  | |  |  |  |  |
| VE (=1) | 0.096*** | | 0.186 |  |  |  |
|  | (0.017) | | (0.165) |  |  |  |
| VEH (=1) | 0.085*** | | 0.302* |  |  |  |
|  | (0.018) | | (0.150) |  |  |  |
| VEHW (=1) | 0.085*** | | 0.101 |  |  |  |
|  | (0.018) | | (0.177) |  |  |  |
| Age |  | |  |  |  |  |
| Age 11 (=1) | 0.064* | | 0.094 | -0.011 | -0.129 | 0.030 |
|  | (0.032) | | (0.082) | (0.103) | (0.087) | (0.105) |
| Age 12 (=1) | 0.018 | | 0.057 | -0.011 | -0.126 | -0.014 |
|  | (0.030) | | (0.074) | (0.097) | (0.079) | (0.095) |
| Age 13 (=1) | -0.001 | | 0.010 | 0.023 | -0.087 | 0.030 |
|  | (0.029) | | (0.073) | (0.092) | (0.077) | (0.094) |
| Age 14 (=1) | -0.022 | | 0.015 | 0.010 | -0.125 | -0.028 |
|  | (0.028) | | (0.071) | (0.092) | (0.077) | (0.091) |
| Age 15 (=1) | Ref | | ref |  |  | - |
|  |  | |  |  |  |  |
| Grade attainment (completed grades) | 0.006 | | 0.013 | -0.013 | -0.017 | 0.002 |
|  | (0.006) | | (0.016) | (0.020) | (0.019) | (0.020) |
| Cognitive test score | 0.004† | | 0.001 | -0.000 | 0.008 | 0.002 |
|  | (0.002) | | (0.005) | (0.006) | (0.007) | (0.006) |
| Mother completed primary school (=1) | -0.012 | | -0.042 | 0.062 | 0.027 | 0.022 |
|  | (0.012) | | (0.033) | (0.040) | (0.038) | (0.040) |
| Father completed primary school (=1) | 0.003 | | 0.072† | -0.106** | -0.098** | -0.062 |
|  | (0.014) | | (0.042) | (0.047) | (0.047) | (0.050) |
| Lives with both parents (=1) | 0.019† | | 0.001 | 0.027 | 0.036 | 0.014 |
|  | (0.012) | | (0.030) | (0.036) | (0.036) | (0.037) |
| Household wealth quintile | 0.000 | | 0.003 | 0.005 | -0.012 | -0.006 |
|  | (0.004) | | (0.011) | (0.013) | (0.013) | (0.013) |
| Constant | 0.764*** | |  |  |  | 0.683** |
|  | (0.056) | |  |  |  | (0.134) |
|  |  | |  |  |  |  |
| N | 2390 | | 2390 |  |  |  |
| P-value overall F-test | <0.001 | | <0.001 |  |  |  |
| P-value for F-test on treatment arms | 0.001 | | 0.151 |  |  |  |
| P-value for F-test on all interactions with study arms |  | | 0.510 |  |  |  |
| P-value for F-test on interactions with study arm |  | |  | 0.613 | 0.456 | 0.920 |

**Appendix Table 4b. Wajir correlates of two-year follow-up survey response**

|  |  | |  |  |  |  |
| --- | --- | --- | --- | --- | --- | --- |
| Dependent variable: Interviewed at two-year follow-up (=1) | | (1) | (2a) | (2b) | (2c) | (2d) |
|  |  | | X | T2*X | T3*X | T4*X |
| Study arms: V-only (ref) |  | |  |  |  |  |
| VE (=1) | -0.011 | | 0.102 |  |  |  |
|  | (0.034) | | (0.121) |  |  |  |
| VEH (=1) | 0.034† | | 0.026 |  |  |  |
|  | (0.020) | | (0.110) |  |  |  |
| VEHW (=1) | 0.041* | | 0.180* |  |  |  |
|  | (0.020) | | (0.077) |  |  |  |
| Age |  | |  |  |  |  |
| Age 10 (=1) | 0.089*** | | 0.130* | -0.076 | 0.050 | -0.089 |
|  | (0.027) | | (0.049) | (0.080) | (0.075) | (0.067) |
| Age 11 (=1) | 0.043* | | 0.045 | -0.035 | 0.075 | -0.017 |
|  | (0.022) | | (0.043) | (0.060) | (0.068) | (0.056) |
| Age 12 (=1) | 0.014 | | 0.009 | -0.053 | 0.113 | -0.006 |
|  | (0.023) | | (0.051) | (0.068) | (0.071) | (0.064) |
| Age 13 (=1) | 0.010 | | 0.033 | -0.069 | 0.070 | -0.065 |
|  | (0.022) | | (0.044) | (0.062) | (0.064) | (0.058) |
| Age 14 (=1) | ref | | ref |  |  |  |
|  |  | |  |  |  |  |
| Enrolled in current school year (=1) | 0.149*** | | 0.170** | -0.009 | 0.015 | -0.070 |
|  | (0.025) | | (0.060) | (0.082) | (0.080) | (0.069) |
| Grade attainment (completed grades) | 0.014*** | | 0.027** | -0.017 | -0.021** | -0.016* |
|  | (0.004) | | (0.006) | (0.011) | (0.007) | (0.009) |
| Cognitive test score | 0.001 | | -0.004 | -0.002 | 0.009 | 0.012** |
|  | (0.002) | | (0.005) | (0.007) | (0.006) | (0.006) |
| Father attended any school (=1) | -0.007 | | -0.023 | 0.037 | 0.017 | -0.008 |
|  | (0.028) | | (0.049) | (0.090) | (0.069) | (0.078) |
| Lives with both parents (=1) | 0.004 | | 0.001 | 0.040 | -0.033 | -0.012 |
|  | (0.015) | | (0.033) | (0.050) | (0.041) | (0.041) |
| Household wealth quintile | -0.002 | | 0.007 | -0.010 | -0.013 | -0.005 |
|  | (0.007) | | (0.010) | (0.022) | (0.012) | (0.013) |
| District: South (ref) |  | |  |  |  |  |
| East (=1) | 0.039* | | 0.047 | 0.031 | 0.008 | -0.083* |
|  | (0.018) | | (0.031) | (0.051) | (0.050) | (0.041) |
| West (=1) | 0.018 | | 0.070* | -0.076 | -0.030 | -0.074† |
|  | (0.037) | | (0.029) | (0.139) | (0.055) | (0.039) |
| Constant | 0.674*** | |  |  |  | 0.601** |
|  | (0.044) | |  |  |  | (0.068) |
|  |  | |  |  |  |  |
| N | 2147 | | 2147 |  |  |  |
| P-value overall F-test | <0.001 | | <0.001 |  |  |  |
| P-value for F-test on treatment arms | 0.147 | | 0.072 |  |  |  |
| P-value for F-test on all interactions with study arms |  | | 0.002 |  |  |  |
| P-value for F-test on interactions with study arm |  | |  | 0.681 | 0.048 | 0.007 |

**Appendix Table 5: Kibera estimated effects of intent-to-treat, additional results for individual outcomes**

|  | (1) | (2) | (3) | (4) | (5) |
| --- | --- | --- | --- | --- | --- |
|  | V-Only two-year follow-up  Mean | VE  Estimate | VEH  Estimate | VEHW  Estimate | VE-VEH-VEHW combined  Estimate |
| Violence Prevention |  |  |  |  |  |
| Experienced violence by a male in the past year (=1) | 0.422 | -0.088** | -0.059* | -0.042 | -0.063* |
| 95% CI | [0.38, 0.47] | [-0.14, -0.03] | [-0.12, 0.00] | [-0.10, 0.02] | [-0.11, -0.01] |
| P-value |  | 0.003 | 0.042 | 0.165 | 0.010 |
| False discovery rate adjusted q-value |  | 0.024 | 0.179 | 0.256 | 0.044 |
| Adjusted regression estimate |  | -0.089** | -0.060* | -0.044 | -0.064** |
| Weighted regression estimate |  | -0.086** | -0.058* | -0.040 | -0.061* |
| Gender equitable attitudes z-score1 | 0.000 | -0.036 | 0.054 | 0.078 | 0.032 |
| 95% CI | [-0.09, 0.09] | [-0.15, 0.08] | [-0.07, 0.17] | [-0.04, 0.19] | [-0.07, 0.13] |
| P-value |  | 0.545 | 0.375 | 0.194 | 0.527 |
| False discovery rate adjusted q-value |  | 0.843 | 0.581 | 0.261 | 0.561 |
| Adjusted regression estimate |  | -0.050 | 0.053 | 0.076 | 0.026 |
| Weighted regression estimate |  | -0.035 | 0.058 | 0.073 | 0.032 |
| Positive gender schooling attitudes z-score | 0.211 | -0.024 | -0.091† | -0.137* | -0.084* |
| 95% CI | [0.14, 0.28] | [-0.12, 0.07] | [-0.19, 0.01] | [-0.24, -0.03] | [-0.16, 0.00] |
| P-value |  | 0.631 | 0.076 | 0.010 | 0.042 |
| False discovery rate adjusted q-value |  | 0.843 | 0.246 | 0.033 | 0.089 |
| Adjusted regression estimate |  | -0.037 | -0.092† | -0.136** | -0.088* |
| Weighted regression estimate |  | -0.018 | -0.096† | -0.142** | -0.086* |
| Education |  |  |  |  |  |
| Grade attainment | 7.501 | 0.052† | 0.048† | 0.067* | 0.056* |
| 95% CI | [7.38, 7.62] | [0.00, 0.11] | [-0.01, 0.10] | [0.01, 0.12] | [0.01, 0.10] |
| P-value |  | 0.064 | 0.087 | 0.012 | 0.018 |
| False discovery rate adjusted q-value |  | 0.364 | 0.246 | 0.034 | 0.051 |
| Adjusted regression estimate |  | 0.050† | 0.054* | 0.066* | 0.057* |
| Weighted regression estimate |  | 0.054† | 0.049† | 0.071** | 0.058* |
| Primary school complete (=1) | 0.517 | 0.020 | 0.017 | 0.032 | 0.023 |
| 95% CI | [0.47, 0.56] | [-0.03, 0.07] | [-0.03, 0.07] | [-0.02, 0.08] | [-0.02, 0.06] |
| P-value |  | 0.430 | 0.519 | 0.214 | 0.284 |
| False discovery rate adjusted q-value |  | 0.843 | 0.596 | 0.261 | 0.323 |
| Adjusted regression estimate |  | 0.002 | 0.012 | 0.025 | 0.013 |
| Weighted regression estimate |  | 0.024 | 0.014 | 0.032 | 0.023 |
| Enrolled in current school year (=1) | 0.959 | 0.005 | 0.011 | 0.020† | 0.012 |
| 95% CI | [0.94, 0.98] | [-0.02, 0.03] | [-0.01, 0.03] | [0.00, 0.04] | [-0.01, 0.03] |
| P-value |  | 0.644 | 0.309 | 0.050 | 0.194 |
| False discovery rate adjusted q-value |  | 0.843 | 0.527 | 0.094 | 0.244 |
| Adjusted regression estimate |  | 0.004 | 0.011 | 0.019† | 0.011 |
| Weighted regression estimate |  | 0.005 | 0.012 | 0.021* | 0.013 |
| Conditional primary school complete (=1)3 [n=1,104] | 0.887 | 0.037 | 0.020 | 0.070** | 0.042† |
| 95% CI | [0.85, 0.93] | [-0.01, 0.09] | [-0.03, 0.07] | [0.02, 0.12] | [0.00, 0.09] |
| P-value |  | 0.155 | 0.440 | 0.003 | 0.056 |
| False discovery rate adjusted q-value |  | 0.660 | 0.596 | 0.013 | 0.100 |
| Adjusted regression estimate |  | 0.025 | 0.012 | 0.056* | 0.031 |
| Weighted regression estimate |  | 0.037 | 0.021 | 0.071** | 0.043† |
| Conditional transition to secondary school (=1)4 [n=1,131] | 0.836 | 0.036 | 0.035 | 0.071* | 0.047† |
| 95% CI | [0.79, 0.88] | [-0.02, 0.10] | [-0.02, 0.09] | [0.01, 0.13] | [0.00, 0.10] |
| P-value |  | 0.245 | 0.254 | 0.014 | 0.067 |
| False discovery rate adjusted q-value |  | 0.696 | 0.527 | 0.034 | 0.105 |
| Adjusted regression estimate |  | 0.026 | 0.029 | 0.059* | 0.038 |
| Weighted regression estimate |  | 0.036 | 0.036 | 0.071* | 0.048† |
| Health |  |  |  |  |  |
| Knows most fertile period during menstrual cycle (=1) | 0.087 | 0.016 | 0.019 | 0.022 | 0.019 |
| 95% CI | [0.06, 0.11] | [-0.02, 0.05] | [-0.02, 0.05] | [-0.01, 0.06] | [-0.01, 0.05] |
| P-value |  | 0.380 | 0.302 | 0.230 | 0.201 |
| False discovery rate adjusted q-value |  | 0.843 | 0.527 | 0.261 | 0.244 |
| Adjusted regression estimate |  | 0.016 | 0.019 | 0.023 | 0.019 |
| Weighted regression estimate |  | 0.015 | 0.019 | 0.022 | 0.019 |
| Knows method of modern contraception1 (=1) [n=2,175] | 0.555 | -0.007 | 0.130*** | 0.119*** | 0.081** |
| 95% CI | [0.51, 0.60] | [-0.06, 0.05] | [0.07, 0.19] | [0.06, 0.18] | [0.03, 0.13] |
| P-value |  | 0.824 | 0.000 | 0.000 | 0.001 |
| False discovery rate adjusted q-value |  | 0.876 | 0.001 | 0.001 | 0.013 |
| Adjusted regression estimate |  | -0.009 | 0.130*** | 0.120*** | 0.080** |
| Weighted regression estimate |  | -0.007 | 0.133*** | 0.114*** | 0.081** |
| SRH myths knowledge z-score1 [n=1,948] | 0.000 | 0.016 | 0.213** | 0.158* | 0.130* |
| 95% CI | [-0.09, 0.09] | [-0.11, 0.14] | [0.09, 0.34] | [0.03, 0.29] | [0.02, 0.24] |
| P-value |  | 0.800 | 0.001 | 0.016 | 0.015 |
| False discovery rate adjusted q-value |  | 0.876 | 0.007 | 0.034 | 0.051 |
| Adjusted regression estimate |  | 0.006 | 0.210** | 0.160* | 0.126* |
| Weighted regression estimate |  | 0.014 | 0.218** | 0.155* | 0.131* |
| General self-efficacy z-score | 0.325 | 0.152** | 0.030 | 0.055 | 0.079† |
| 95% CI | [0.25, 0.40] | [0.06, 0.25] | [-0.07, 0.13] | [-0.05, 0.16] | [-0.08, 0.12] |
| P-value |  | 0.002 | 0.554 | 0.284 | 0.058 |
| False discovery rate adjusted q-value |  | 0.024 | 0.596 | 0.302 | 0.100 |
| Adjusted regression estimate |  | 0.149** | 0.030 | 0.057 | 0.079† |
| Weighted regression estimate |  | 0.157** | 0.037 | 0.058 | 0.083* |
| Condom use self-efficacy z-score1 [n=1,777] | 0.000 | 0.038 | 0.178** | 0.124† | 0.114* |
| 95% CI | [-0.10, 0.10] | [-0.10, 0.17] | [0.05, 0.30] | [-0.01, 0.25] | [0.01, 0.22] |
| P-value |  | 0.575 | 0.006 | 0.060 | 0.040 |
| False discovery rate adjusted q-value |  | 0.843 | 0.035 | 0.103 | 0.041 |
| Adjusted regression estimate |  | 0.035 | 0.174** | 0.123† | 0.111* |
| Weighted regression estimate |  | 0.045 | 0.188** | 0.117† | 0.118* |
| Wealth creation |  |  |  |  |  |
| Financial literacy z-score | -0.085 | 0.014 | 0.045 | 0.381*** | 0.145** |
| 95% CI | [-0.17, 0.00] | [-0.11, 0.13] | [-0.07, 0.16] | [0.26, 0.50] | [0.05, 0.24] |
| P-value |  | 0.815 | 0.460 | 0.000 | 0.004 |
| False discovery rate adjusted q-value |  | 0.876 | 0.596 | 0.001 | 0.023 |
| Adjusted regression estimate |  | -0.007 | 0.040 | 0.379*** | 0.136** |
| Weighted regression estimate |  | 0.009 | 0.037 | 0.369*** | 0.138** |
| Saved money in the past six months (=1) | 0.448 | 0.000 | 0.017 | 0.202*** | 0.072** |
| 95% CI | [0.40, 0.49] | [-0.06, 0.06] | [-0.04, 0.08] | [0.14, 0.26] | [0.02, 0.12] |
| P-value |  | 1.000 | 0.560 | 0.000 | 0.003 |
| False discovery rate adjusted q-value |  | 1.000 | 0.596 | 0.001 | 0.023 |
| Adjusted regression estimate |  | -0.004 | 0.017 | 0.202*** | 0.071** |
| Weighted regression estimate |  | 0.005 | 0.018 | 0.205*** | 0.075** |
| Household-level outcomes |  |  |  |  |  |
| Household wealth quintile [n=2,236] | 2.823 | 0.101 | 0.123 | 0.105 | 0.110 |
| 95% CI | [2.70, 2.95] | [-0.06, 0.26] | [-0.03, 0.28] | [-0.06, 0.27] | [-0.02, 0.24] |
| P-value |  | 0.214 | 0.125 | 0.201 | 0.102 |
| False discovery rate adjusted q-value |  | 0.696 | 0.304 | 0.261 | 0.145 |
| Adjusted regression estimate |  | 0.093 | 0.130 | 0.099 | 0.107 |
| Weighted regression estimate |  | 0.112 | 0.129 | 0.111 | 0.117† |
| Expected girl to complete secondary school (=1) [n=2,193] | 0.994 | 0.002 | -0.001 | 0.004 | 0.001 |
| 95% CI | [0.99, 1.00] | [-0.01, 0.01] | [-0.01, 0.01] | [0.00, 0.01] | [-0.01, 0.01] |
| P-value |  | 0.629 | 0.777 | 0.304 | 0.682 |
| False discovery rate adjusted q-value |  | 0.843 | 0.778 | 0.305 | 0.682 |
| Adjusted regression estimate |  | 0.002 | -0.001 | 0.004 | 0.002 |
| Weighted regression estimate |  | 0.002 | -0.002 | 0.004 | 0.001 |

Notes: The table reproduces the results shown in Table 4 (see notes for Table 4) in the text and also reports the associated P-values. Additional results reported include the false discovery rate adjusted q-value based on consideration of all 17 outcomes at once. Main regressions in the text Table 4 were estimated with robust standard errors and included controls for age and the outcome measured at baseline unless otherwise noted. The adjusted regression results additionally control baseline cognitive test score, school enrollment, grades attained, mother and father completion of primary school, whether the girl lives with both parents, wealth quintile and an indicator variable if any of these additional controls were imputed. The weighted regression results reweight observations based on estimated probability of having been re-interviewed in the two-year follow-up (see note on attrition weight construction below). N = 2,190; sample is smaller for some individual outcomes due to missing data as indicated.

1 No baseline control for outcome variable available.

2 Among girls who had completed Class 6 but had not yet completed Class 8 at baseline.

3 Among girls who had completed Class 6 but had not yet enrolled in secondary school at baseline.

*** p<0.001, ** p<0.01, * p<0.05, † p<0.1

**Appendix Table 6: Kibera estimated effects of intent-to-treat, additional results for summary outcomes**

|  | (1) | (2) | (3) | (4) | (5) |
| --- | --- | --- | --- | --- | --- |
|  | V-Only two-year follow-up  Mean | VE  Estimate | VEH  Estimate | VEHW  Estimate | VE-VEH-VEHW combined  Estimate |
| Violence Prevention |  |  |  |  |  |
| *Violence prevention outcomes summary index z-score*2 | 0.000 | 0.066 | 0.037 | -0.004 | 0.033 |
| 95% CI | [-0.09, 0.09] | [-0.05, 0.19] | [-0.08, 0.16] | [-0.13, 0.12] | [-0.07, 0.13] |
| P-value |  | 0.275 | 0.551 | 0.954 | 0.510 |
| False discovery rate adjusted q-value |  | 0.368 | 0.552 | 0.955 | 0.511 |
| Adjusted regression estimate |  | 0.050 | 0.036 | -0.004 | 0.028 |
| Weighted regression estimate |  | 0.068 | 0.034 | -0.011 | 0.030 |
| Education |  |  |  |  |  |
| *Education outcomes summary index z-score (grade, primary, enroll)* | 0.000 | 0.062 | 0.082 | 0.123* | 0.089* |
| 95% CI | [-0.09, 0.09] | [-0.04, 0.17] | [-0.02, 0.18] | [0.03, 0.22] | [0.00, 0.17] |
| P-value |  | 0.248 | 0.107 | 0.013 | 0.042 |
| False discovery rate adjusted q-value |  | 0.368 | 0.214 | 0.018 | 0.056 |
| Adjusted regression estimate |  | 0.043 | 0.082† | 0.116* | 0.080† |
| Weighted regression estimate |  | 0.068 | 0.088† | 0.129* | 0.095* |
| Health |  |  |  |  |  |
| *Health outcomes summary index z-score* | 0.000 | 0.113† | 0.306*** | 0.279*** | 0.233*** |
| 95% CI | [-0.09, 0.09] | [0.00, 0.23] | [0.19, 0.42] | [0.16, 0.40] | [0.14, 0.33] |
| P-value |  | 0.056 | 0.000 | 0.000 | 0.000 |
| False discovery rate adjusted q-value |  | 0.226 | 0.001 | 0.001 | 0.001 |
| Adjusted regression estimate |  | 0.102† | 0.302*** | 0.279*** | 0.228*** |
| Weighted regression estimate |  | 0.114† | 0.317*** | 0.273*** | 0.236*** |
| Wealth creation |  |  |  |  |  |
| *Wealth creation outcomes summary index z-score* | 0.000 | 0.015 | 0.056 | 0.517*** | 0.194*** |
| 95% CI | [-0.09, 0.09] | [-0.10, 0.13] | [-0.06, 0.17] | [0.40, 0.63] | [0.10, 0.29] |
| P-value |  | 0.807 | 0.347 | 0.000 | 0.000 |
| False discovery rate adjusted q-value |  | 0.808 | 0.463 | 0.001 | 0.001 |
| Adjusted regression estimate |  | -0.005 | 0.052 | 0.516*** | 0.186*** |
| Weighted regression estimate |  | 0.015 | 0.050 | 0.511*** | 0.191*** |

Notes: See notes for Appendix Table 5. The table reproduces the results shown in Table 4 for summary outcomes, reporting additional information as in Appendix Table 5.

*** p<0.001, ** p<0.01, * p<0.05, † p<0.1

**Appendix Table 7: Wajir estimated effects of intent-to-treat, additional results for individual outcomes**

|  | (1) | (2) | (3) | (4) | (5) |
| --- | --- | --- | --- | --- | --- |
|  | V-Only two-year follow-up  Mean | VE  Estimate | VEH  Estimate | VEHW  Estimate | VE-VEH-VEHW combined  Estimate |
| Violence Prevention |  |  |  |  |  |
| Experienced violence by a male in the past year (=1) [n=1,878] | 0.038 | -0.006 | 0.015 | -0.022 | -0.004 |
| 95% CI | [0.01, 0.06] | [-0.04, 0.03] | [-0.02, 0.05] | [-0.05, 0.01] | [-0.03, 0.03] |
| P-value |  | 0.774 | 0.422 | 0.112 | 0.787 |
| False discovery rate adjusted q-value |  | 0.775 | 0.537 | 0.241 | 0.848 |
| Adjusted regression estimate |  | -0.003 | 0.016 | -0.022 | -0.003 |
| Weighted regression estimate |  | -0.006 | 0.028 | -0.020 | 0.000 |
| Gender equitable attitudes z-score1 [n=1,903] | 0.000 | -0.171 | -0.208* | -0.018 | -0.132 |
| 95% CI | [-0.17, 0.17] | [-0.39, 0.05] | [-0.39, -0.02] | [-0.26, 0.22] | [-0.31, 0.05] |
| P-value |  | 0.127 | 0.029 | 0.882 | 0.146 |
| False discovery rate adjusted q-value |  | 0.179 | 0.068 | 0.882 | 0.211 |
| Adjusted regression estimate |  | -0.167 | -0.208* | -0.013 | -0.130 |
| Weighted regression estimate |  | -0.134 | -0.116 | 0.057 | -0.068 |
| Positive gender schooling attitudes z-score [n=1,878] | 0.160 | 0.156* | 0.099 | 0.068 | 0.107† |
| 95% CI | [0.05, 0.27] | [0.00, 0.31] | [-0.05, 0.25] | [-0.08, 0.21] | [-0.02, 0.23] |
| P-value |  | 0.044 | 0.198 | 0.346 | 0.085 |
| False discovery rate adjusted q-value |  | 0.104 | 0.294 | 0.441 | 0.150 |
| Adjusted regression estimate |  | 0.196** | 0.118 | 0.104 | 0.138* |
| Weighted regression estimate |  | 0.182* | 0.096 | 0.075 | 0.120* |
| Education |  |  |  |  |  |
| Grade attainment | 4.492 | 0.259** | 0.194* | 0.181* | 0.211** |
| 95% CI | [3.98, 5.01] | [0.10, 0.42] | [0.02, 0.36] | [0.01, 0.35] | [0.08, 0.34] |
| P-value |  | 0.002 | 0.026 | 0.036 | 0.002 |
| False discovery rate adjusted q-value |  | 0.012 | 0.068 | 0.168 | 0.011 |
| Adjusted regression estimate |  | 0.311*** | 0.200* | 0.198* | 0.235*** |
| Weighted regression estimate |  | 0.234** | 0.203* | 0.145† | 0.196** |
| Primary school complete (=1) | 0.130 | 0.010 | 0.021 | -0.029 | 0.001 |
| 95% CI | [0.08, 0.18] | [-0.05, 0.07] | [-0.05, 0.09] | [-0.08, 0.03] | [-0.05, 0.05] |
| P-value |  | 0.756 | 0.545 | 0.307 | 0.984 |
| False discovery rate adjusted q-value |  | 0.775 | 0.636 | 0.430 | 0.984 |
| Adjusted regression estimate |  | 0.021 | 0.040* | 0.004 | 0.022 |
| Weighted regression estimate |  | 0.025 | 0.006 | -0.032 | 0.001 |
| Enrolled in current school year (=1) | 0.808 | 0.144*** | 0.070* | 0.084** | 0.099*** |
| 95% CI | [0.74, 0.87] | [0.09, 0.20] | [0.01, 0.13] | [0.02, 0.14] | [0.05, 0.15] |
| P-value |  | 0.000 | 0.025 | 0.006 | 0.000 |
| False discovery rate adjusted q-value |  | 0.001 | 0.068 | 0.042 | 0.001 |
| Adjusted regression estimate |  | 0.146*** | 0.072* | 0.085** | 0.100*** |
| Weighted regression estimate |  | 0.146*** | 0.086* | 0.087** | 0.108*** |
| Health |  |  |  |  |  |
| Knows most fertile period during menstrual cycle (=1) [n=1,878] | 0.049 | -0.031† | -0.021 | -0.013 | -0.021 |
| 95% CI | [0.02, 0.08] | [-0.06, 0.00] | [-0.05, 0.01] | [-0.04, 0.02] | [-0.05, 0.01] |
| P-value |  | 0.072 | 0.182 | 0.417 | 0.150 |
| False discovery rate adjusted q-value |  | 0.144 | 0.294 | 0.486 | 0.211 |
| Adjusted regression estimate |  | -0.029† | -0.019 | -0.010 | -0.019 |
| Weighted regression estimate |  | -0.028† | -0.015 | -0.010 | -0.018 |
| Knows method of modern contraception1 (=1) [n=1,848] | 0.390 | -0.097† | -0.103* | -0.096† | -0.099* |
| 95% CI | [0.31, 0.47] | [-0.21, 0.02] | [-0.19, -0.01] | [-0.20, 0.01] | [-0.19, -0.01] |
| P-value |  | 0.090 | 0.027 | 0.079 | 0.027 |
| False discovery rate adjusted q-value |  | 0.159 | 0.068 | 0.238 | 0.062 |
| Adjusted regression estimate |  | -0.080 | -0.091* | -0.072 | -0.081* |
| Weighted regression estimate |  | -0.074 | -0.095* | -0.075 | -0.081* |
| SRH myths knowledge z-score1,3 [n=1,400] | 0.000 | 0.344* | 0.433** | 0.234† | 0.335** |
| 95% CI | [-0.20, 0.20] | [0.08, 0.60] | [0.17, 0.70] | [-0.03, 0.50] | [0.12, 0.55] |
| P-value |  | 0.010 | 0.002 | 0.085 | 0.003 |
| False discovery rate adjusted q-value |  | 0.041 | 0.026 | 0.238 | 0.012 |
| Adjusted regression estimate |  | 0.341* | 0.435** | 0.230† | 0.335** |
| Weighted regression estimate |  | 0.339* | 0.357* | 0.206 | 0.299** |
| General self-efficacy z-score [n=1,878] | 0.990 | -0.054 | -0.014 | -0.030 | -0.032 |
| 95% CI | [0.86, 1.12] | [-0.25, 0.14] | [-0.22, 0.19] | [-0.22, 0.16] | [-0.19, 0.13] |
| P-value |  | 0.583 | 0.893 | 0.756 | 0.687 |
| False discovery rate adjusted q-value |  | 0.680 | 0.894 | 0.814 | 0.801 |
| Adjusted regression estimate |  | -0.022 | 0.003 | -0.004 | -0.008 |
| Weighted regression estimate |  | -0.053 | 0.019 | -0.035 | -0.024 |
| Wealth creation |  |  |  |  |  |
| Financial literacy z-score [n=1,878] | 0.439 | -0.069 | 0.030 | 0.185 | 0.050 |
| 95% CI | [0.25, 0.63] | [-0.31, 0.17] | [-0.19, 0.25] | [-0.06, 0.43] | [-0.16, 0.26] |
| P-value |  | 0.564 | 0.793 | 0.137 | 0.639 |
| False discovery rate adjusted q-value |  | 0.680 | 0.855 | 0.241 | 0.801 |
| Adjusted regression estimate |  | -0.001 | 0.049 | 0.244* | 0.098 |
| Weighted regression estimate |  | -0.055 | 0.026 | 0.192 | 0.049 |
| Saved money in the past six months (=1) [n=1,878] | 0.011 | 0.030 | 0.047* | 0.409*** | 0.164*** |
| 95% CI | [0.00, 0.02] | [-0.01, 0.07] | [0.01, 0.09] | [0.31, 0.51] | [0.09, 0.23] |
| P-value |  | 0.123 | 0.022 | 0.000 | 0.000 |
| False discovery rate adjusted q-value |  | 0.179 | 0.068 | 0.001 | 0.001 |
| Adjusted regression estimate |  | 0.042* | 0.049* | 0.418*** | 0.170*** |
| Weighted regression estimate |  | 0.036† | 0.045* | 0.423*** | 0.161*** |
| Household-level outcomes |  |  |  |  |  |
| Household wealth quintile [n=2,011] | 3.226 | -0.434* | -0.247 | -0.211 | -0.296† |
| 95% CI | [2.93, 3.52] | [-0.83, -0.04] | [-0.64, 0.14] | [-0.54, 0.12] | [-0.59, 0.00] |
| P-value |  | 0.032 | 0.210 | 0.210 | 0.050 |
| False discovery rate adjusted q-value |  | 0.090 | 0.294 | 0.327 | 0.101 |
| Adjusted regression estimate |  | -0.424* | -0.246 | -0.186 | -0.283† |
| Weighted regression estimate |  | -0.389* | -0.143 | -0.143 | -0.234 |
| Expected girl to complete secondary school (=1) [n=2,007] | 0.861 | 0.058* | 0.050† | 0.043 | 0.050* |
| 95% CI | [0.82, 0.91] | [0.01, 0.10] | [0.00, 0.10] | [-0.01, 0.10] | [0.01, 0.09] |
| P-value |  | 0.012 | 0.070 | 0.134 | 0.022 |
| False discovery rate adjusted q-value |  | 0.041 | 0.140 | 0.241 | 0.062 |
| Adjusted regression estimate |  | 0.074** | 0.052* | 0.056* | 0.060** |
| Weighted regression estimate |  | 0.055** | 0.048† | 0.032 | 0.046* |

Notes: The table reproduces the results shown in Table 5 (see notes for Table 5) in the text and also reports the associated P-values. Additional results reported include the false discovery rate adjusted q-value based on consideration of all 14 outcomes at once. Main regressions in the text Table 5 were estimated with standard errors clustered at the village level and included controls for district per the stratified randomization, age and the outcome measured at baseline unless otherwise noted. The adjusted regression results additionally control baseline cognitive test score, school enrollment, grades attained, whether father had attended school, whether the girl lives with both parents, wealth quintile and an indicator variable if any of these additional controls were imputed. The weighted regression results reweight observations based on estimated probability of having been re-interviewed in the two-year follow-up (see note on attrition weight construction below). N = 1,909; sample is smaller for some individual outcomes due to missing data as indicated.

1 No baseline control for outcome variable available.

2 Violence prevention indicator reverse coded prior to inclusion in summary variable.

3 Non-response for one or more items on the scale ranged from 24–30% across study arms and was higher for younger girls.

*** p<0.001, ** p<0.01, * p<0.05, † p<0.1

**Appendix Table 8: Wajir estimated effects of intent-to-treat, additional results for summary outcomes**

|  | (1) | (2) | (3) | (4) | (5) |
| --- | --- | --- | --- | --- | --- |
|  | V-Only two-year follow-up  Mean | VE  Estimate | VEH  Estimate | VEHW  Estimate | VE-VEH-VEHW combined  Estimate |
| Violence Prevention |  |  |  |  |  |
| *Violence prevention outcomes summary index z-score2* [n=1,878] | 0.000 | 0.030 | -0.101 | 0.104 | 0.010 |
| 95% CI | [-0.15, 0.15] | [-0.15, 0.21] | [-0.29, 0.08] | [-0.07, 0.27] | [-0.15, 0.17] |
| P-value |  | 0.731 | 0.283 | 0.229 | 0.896 |
| False discovery rate adjusted q-value |  | 0.795 | 0.378 | 0.306 | 0.917 |
| Adjusted regression estimate |  | 0.063 | -0.086 | 0.136 | 0.035 |
| Weighted regression estimate |  | 0.069 | -0.094 | 0.143† | 0.040 |
| Education |  |  |  |  |  |
| *Education outcomes summary index z-score* | 0.000 | 0.302*** | 0.189* | 0.122 | 0.203** |
| 95% CI | [-0.16, 0.16] | [0.16, 0.44] | [0.02, 0.36] | [-0.03, 0.27] | [0.08, 0.32] |
| P-value |  | 0.000 | 0.031 | 0.109 | 0.001 |
| False discovery rate adjusted q-value |  | 0.001 | 0.063 | 0.219 | 0.003 |
| Adjusted regression estimate |  | 0.313*** | 0.198* | 0.120† | 0.208*** |
| Weighted regression estimate |  | 0.329*** | 0.188* | 0.112† | 0.216*** |
| Health |  |  |  |  |  |
| *Health outcomes summary index z-score* [n=1,878] | 0.000 | -0.026 | 0.066 | -0.014 | 0.009 |
| 95% CI | [-0.17, 0.17] | [-0.22, 0.17] | [-0.13, 0.26] | [-0.22, 0.19] | [-0.17, 0.19] |
| P-value |  | 0.795 | 0.508 | 0.890 | 0.917 |
| False discovery rate adjusted q-value |  | 0.795 | 0.508 | 0.891 | 0.917 |
| Adjusted regression estimate |  | 0.019 | 0.091 | 0.031 | 0.048 |
| Weighted regression estimate |  | 0.001 | 0.060 | -0.006 | 0.018 |
| Wealth creation |  |  |  |  |  |
| *Wealth creation outcomes summary index z-score* [n=1,878] | 0.000 | 0.167 | 0.349* | 2.852*** | 1.135*** |
| 95% CI | [-0.15, 0.15] | [-0.14, 0.47] | [0.03, 0.66] | [2.14, 3.56] | [0.63, 1.64] |
| P-value |  | 0.284 | 0.030 | 0.000 | 0.000 |
| False discovery rate adjusted q-value |  | 0.568 | 0.063 | 0.001 | 0.001 |
| Adjusted regression estimate |  | 0.285† | 0.373* | 2.951*** | 1.208*** |
| Weighted regression estimate |  | 0.212 | 0.337* | 2.944*** | 1.119*** |

Notes: See notes for Appendix Table 7. The table reproduces the results shown in Table 5 for summary outcomes, reporting additional information as in Appendix Table 7.

*** p<0.001, ** p<0.01, * p<0.05, † p<0.1

*Note on attrition weight construction*

We calculated inverse probability weights (IPW) for each site (and for individual- and household-level survey variables separately) as follows. First, we constructed approximately 60 indicators from each baseline survey (imputing the less than 1% of missing values with local area or village medians). In addition to variables in Appendix Tables 2 and 3, these included other individual level indicators (such as measures of residential mobility) and a wide range of housing characteristics and ownership of household-level assets reported in Austrian et al. (2015). In Wajir, we also included a binary indicator for nine clusters with security concerns during fieldwork. Second, we ran bivariate regressions on an indicator of being interviewed at the two-year follow-up for each variable (separately for the V-only sample and for the VE, VEH and VEHW sample). We retained for potential inclusion in the weight construction all variables significant at 10%. Third, each variable, along with indicators for age in years (and district in Wajir) was interacted with a binary indicator of treatment in VE, VEH and VEHW (as in Table 4) so that the weights could be calculated separately for each study arm. Fourth, we estimated the probability of being interviewed on this set of baseline predictors. To account for collinearity between predictors, the baseline predictor set was further limited by conducting stepwise selection of variables with backward elimination and using the adjusted R2 as the information criteria. Indicators for study arm and age (and district in Wajir) were fixed in the regressions. At each step, the iterative procedure removes from the model the predictor that most improves the information criterion until there is no variable whose removal improves it. We implemented this using ‘vselect’ in Stata (Lindsey and Sheather 2010). Fifth, using the final model for each site and survey type, we predicted for each observation the probability of having been re-interviewed and constructed the IPW. Last, for Wajir we multiplied those weights with sample population weights based on the size of each cluster. In Kibera, sample weights for the individual analyses ranged from 0.88 to 1.67 (25th percentile 1.02, 50th 1.07, 75th 1.15). In Wajir where they also incorporate population weights, weights ranged from 0.88 to 7.96 (25th 1.21, 50th 1.37, 75th 1.73).

References:

Austrian, K, Muthengi, E, Riley, T, Mumah, J, Kabiru C and Abuya B. (2015). AGI-K Baseline Report. Nairobi: Population Council.

Lindsey, C. and S. Sheather. (2010). “Variable selection in linear regression.” *The Stata Journal*, 10(4): 650–669.

**Appendix Table 9: Two-year follow-up outcomes variable definitions**

|  | Survey items | Survey instrument |
| --- | --- | --- |
| Violence prevention |  |  |
| Experienced violence by a male in the past year | Any male done any of the following things to girl in the past year:   1. Say or do something to humiliate you in front of others 2. Threaten to hurt or harm you or someone close to you 3. Insult you or make you feel bad about yourself 4. Push you, shake you, or throw something at you 5. Slap you 6. Twist your arm or pull your hair 7. Punch you with his fist or something that could hurt you 8. Kick you, drag you, or beat you up 9. Try to choke you or burn you on purpose 10. Threatened to attack you with a knife or other weapon 11. Attacked you with a weapon 12. Touched you in a sexual way (e.g. kissing, grabbing, or fondling), when you did not want them to 13. Try to have sexual intercourse with you when you did not want to but did not succeed 14. Physically forced you to have sexual intercourse even when you did not want to 15. Forced you to perform sexual acts when you did not want to | Individual |
| Gender equitable attitudes score | Agree or disagree with the statements:   1. Girls should avoid playing sports with boys because they get hurt easily 2. Boys should be raised tough so they can overcome any difficulty in life 3. Girls should avoid raising their voice to be lady like 4. Boys should always defend themselves even if it means fighting 5. Girls are expected to be humble 6. Girls should always fight back if boys try to take advantage of them 7. Girls need their parents’ protection more than boys 8. Boys should be able to show their feelings without fear of being teased 9. Boys who behave like girls are considered weak 10. It's important for boys to show they are tough |  |
| Positive gender schooling attitudes | Agree or disagree with the statements:   1. It is as important for girls to complete secondary school as it is for boys 2. When a family cannot afford to send all children to school, it is better to send boys than girls 3. A 16-year-old girl should get married when she finds an appropriate partner, even if she is still in school 4. Girls are as intelligent as boys |  |
|  |  |  |
|  |  |  |
| Education |  |  |
| Highest grade completed | Was the highest level of school you attended: primary or secondary? What is the highest class you completed at primary school? What is the highest class you completed at secondary school? | Individual |
| Primary school completed | Has completed primary school (class 8) | Individual |
| School enrollment | Have you attended school at any time during [the 2017 school year]? | Individual |
| Conditional primary school completion | Respondents who had completed class 6 or 7 (but not class 8) at baseline completed class 8 | Individual |
| Transition to secondary school | Respondents who had completed class 6, 7 or 8 (but not enrolled in secondary) at baseline had enrolled in secondary | Individual |
| Literacy in Swahili and English | Sentences in Swahili:   1. Ukulima ni kazi ngumu 2. Mtoto anasoma kitabu   Sentences in English:   1. Parents love their children 2. Farming is hard work | Individual literacy assessment |
| Health |  |  |
| Knows most fertile period during menstrual cycle | From one menstrual period to the next, are there certain days when a woman is more likely to become pregnant if she has sexual relations? Is this time just before her period begins, during her period, right after her period has ended, or two weeks after her period? | Individual |
| Knows method of modern contraception | I would like to talk about family planning – the various ways or methods that a couple can use to delay or avoid a pregnancy. Which ways or methods have you heard about? Pill, IUD, injectables, implants, male condom, female condom, emergency contraception | Individual |
| SRH myths knowledge score | State if the following are facts or myths:   1. One cannot get pregnant with one sexual act 2. Contraceptives are for married women 3. Use two condoms for double protection 4. Menstrual blood means a woman is dirty 5. Contraceptive use is harmful for health 6. Contraceptive pills make women barren 7. Sexual feelings are normal | Individual |
| General self-efficacy score | I am going to read you some statements, please tell me if you agree or disagree with them:   1. I can always manage to solve difficult problems if I try hard enough. 2. I am confident that I could handle unexpected events very well. 3. Because of the help I can get, I know how to manage unexpected situations. 4. I can solve most problems if I make the necessary effort. 5. If I am in trouble, I can usually think of a solution. 6. I can usually handle any situation that comes my way. | Individual  Alpha Kibera: 0.59  Wajir: 0.73 |
| Condom use self-efficacy score | I am going to read you some statements, please tell me if you are very unsure, somewhat unsure, somewhat sure, sure, very sure:   1. I could carry a condom with me in case I needed one 2. I could use a condom each time I and my partner had sex 3. I could talk about using a condom if I were unsure about my partner's feelings on condoms 4. I could talk a partner into using a condom when we have sexual intercourse 5. I could say no to sex if my partner refused to use a condom | Individual  Alpha Kibera: 0.85 |
| Wealth creation |  |  |
| Financial literacy score | I’m going to read you a story and then ask you some questions about the story: "Each week, Anna sits down and plans what she will earn and spend in the next week. She writes down all the places where she will get money and all the things she will spend it on. Then she is able to see if she has enough money for all of what she wants to buy."   1. Do you have such a plan? 2. What would you call that kind of plan?   I’m going to read you another story and then ask you some questions about it: ''Imani is 17 and and lives with her mother and her younger sister. Her older sister Mary is married and lives in another town, three hours away. Mary just had a baby boy, and Imani is eager to visit her sister. Imani will need to save money for transport and a small gift for the baby. A cute little hat would be perfect! But she can’t take money from her savings because she is saving that money to start her own business. Imani’s dream is to start a small catering business. Hopefully, her neighbor will employ her to work extra days in her hotel so she can get the money she needs for her trip."   1. What is one of Imani's short term financial goals? 2. What is Imani’s long term financial goal? 3. What is one formal way of saving your money? 4. What is one informal way of saving your money? 5. Grace would like to buy a new notebook for the next school term which starts in eight weeks. If the notebook costs KSH 100 and she can save KSH10 each week, will she reach her goal? 6. In the situation I described in the previous question, if Grace figured out how much she needed to save each week, and for how many weeks she needed to save in order to reach her goal, what would that be called? 7. If Grace discovered that she couldn’t reach her goal with that plan, what changes could she make so she would still reach her goal? 8. Do you agree or disagree with the following statement: “Only people with a lot of money can save”? | Individual |
| Saved money in the past six months | In the past six months, have you saved, or put money aside to use at a later time? | Individual |

|  |  |  |
| --- | --- | --- |
| Household-level |  |  |
| Household wealth quintile | PCA estimated using the following ten items:   1. Does this household own any livestock, herds, other farm animals, or poultry? 2. Does any member of this household own any agricultural land? 3. Does your household have a television? 4. Does your household have a clock or watch? 5. Does your household have a mosquito net? 6. How many rooms in this household are used for sleeping? 7. In the last one month, was there a day that the household went without food because there wasn't enough food in the household? 8. Does your household have enough savings or something(s) to sell if you need 1000 shillings? 9. Does your household have enough savings or something(s) to sell if you need 5000 shillings? 10. Does your household have enough savings or something(s) to sell if you need 10000 shillings? | Household |
| Expected girl to complete secondary school | What is the highest level of school that you expect [NAME] to complete? | Household |
|  |  |  |
